# Supplementary material for: Solution interaction of O-donor ligand metal complexes with thiocarbonyl compounds—a new general route to metal sulfide materials
Source: Royal Society of Chemistry journal article supplement (doi:10.1039/b300398c), 2003-01-01
Supplement: b300398c-a.pdf [file b300398c-a.pdf]

**Electronic supplementary material** to: Structural studies of N-(2'-substituted phenyl)-9,10-dihydro-9,10-ethanoanthracene-11,12-dicarboximides by X-ray diffraction and NMR spectroscopy – Proofs for CH/ $\pi$  interactions in liquid and solid phases (New J. Chem.)

### Chosen arrangements of conformations in compound 1

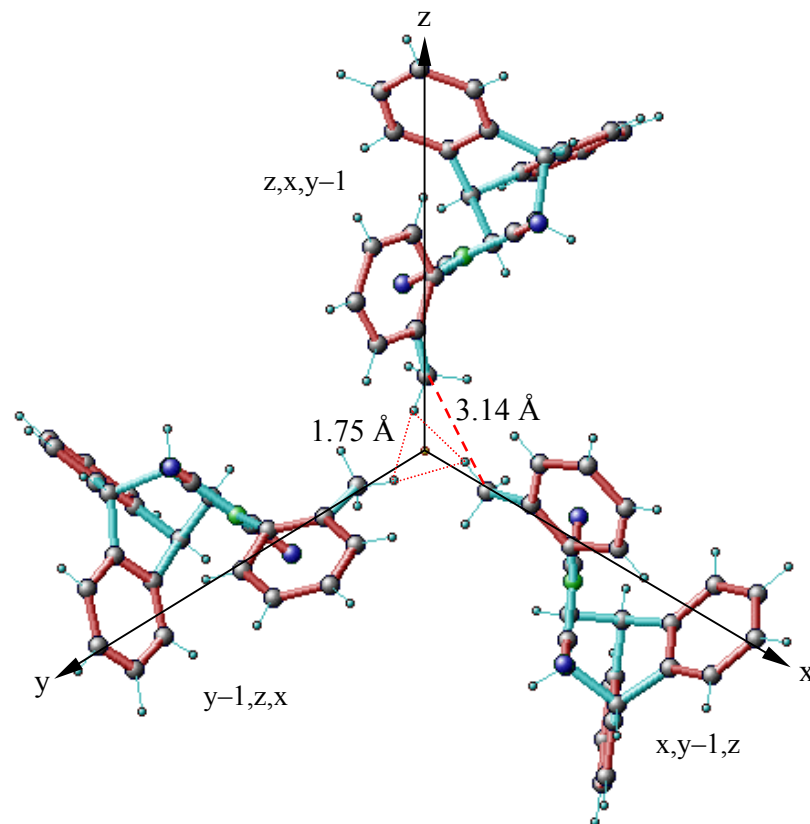

Conformations: *anti-1* all

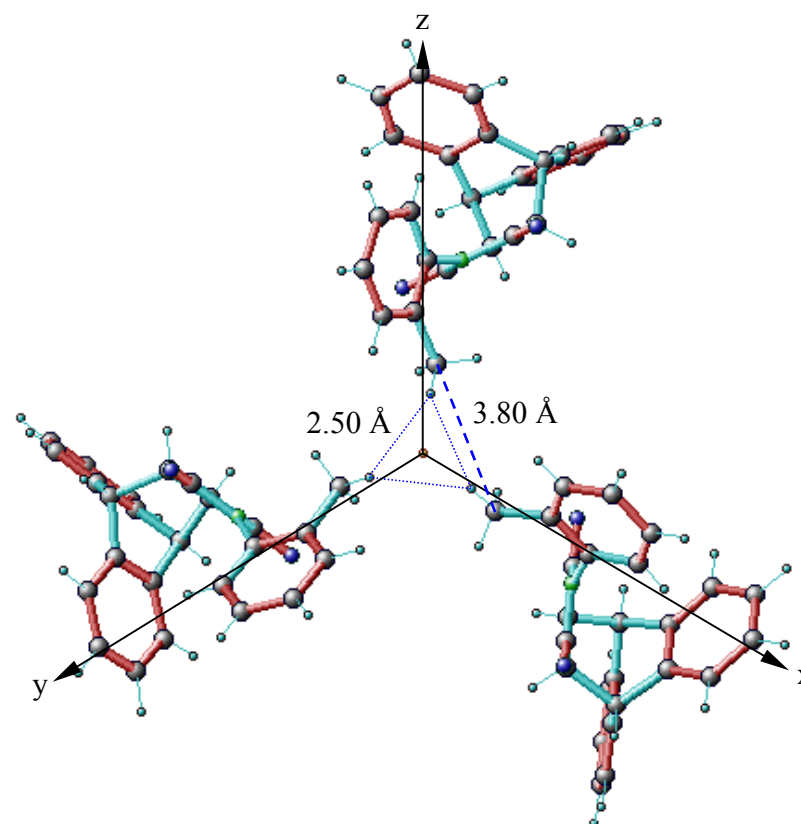

Conformations: *anti-2* all

Distances C $\cdots$ C are marked with broken lines.  
Distances H $\cdots$ H are marked with dotted lines.

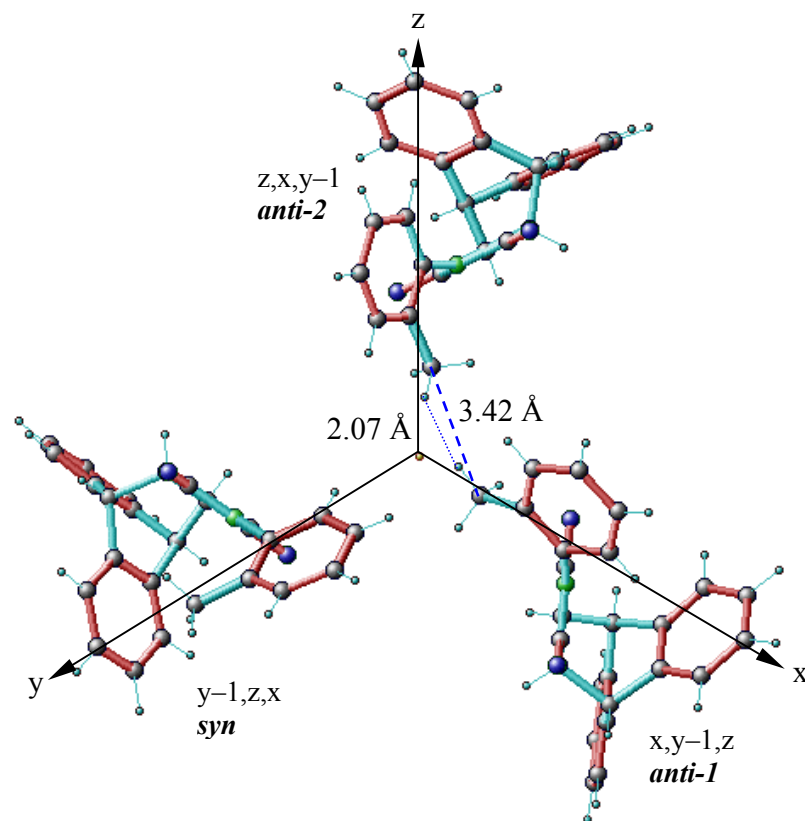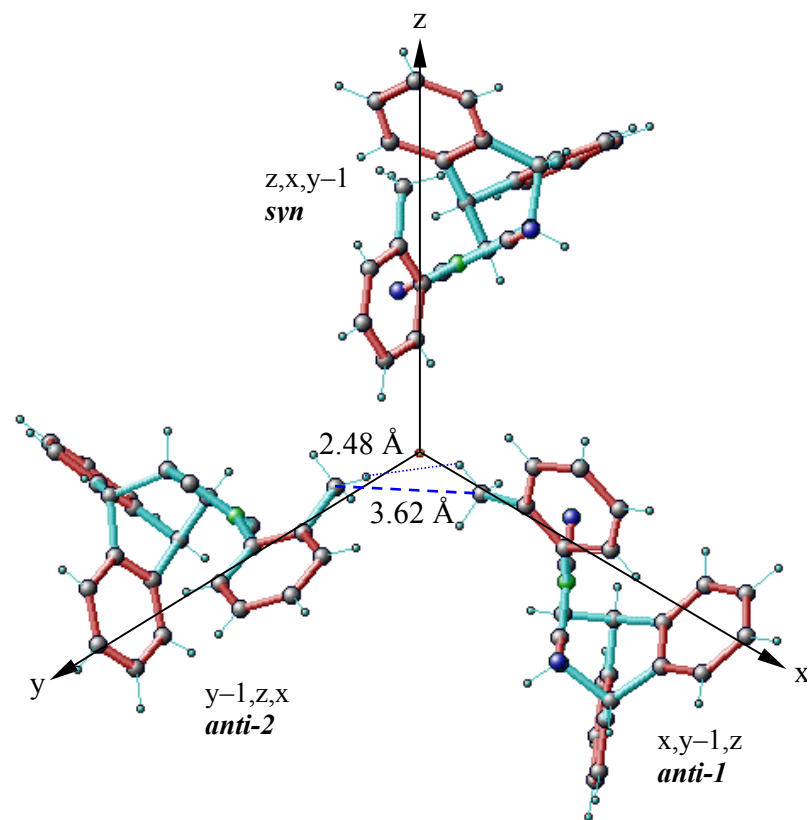

Distances C···C are marked with broken lines.

Distances H···H are marked with dotted lines.

Authors: G. Grossmann, M. J. Potrzebowski, S. Olejniczak, N. E. Ziółkowska, G. D. Bujacz, W. Ciesielski, W. Prezdo, V. Nazarov and V. Golovko
