# Supplementary material for: Solution interaction of O-donor ligand metal complexes with thiocarbonyl compounds—a new general route to metal sulfide materials
Source: Royal Society of Chemistry journal article supplement (doi:10.1039/b300398c), 2003-01-01
Supplement: b300398c-b.pdf [file b300398c-b.pdf]

**Electronic supplementary material** to: Structural studies of N-(2'-substituted phenyl)-9,10-dihydro-9,10-ethanoanthracene-11,12-dicarboximides by X-ray diffraction and NMR spectroscopy – Proofs for CH/ $\pi$  interactions in liquid and solid phases (New J. Chem.)

## Molecular packing and intermolecular CH/ $\pi$ interactions of the compound 2

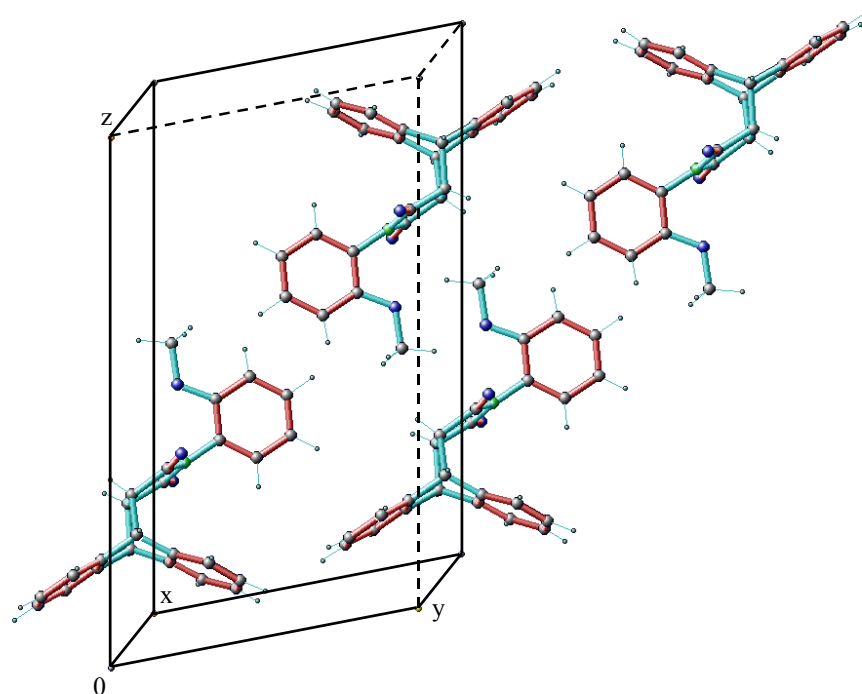

Packing of the independent molecules 1

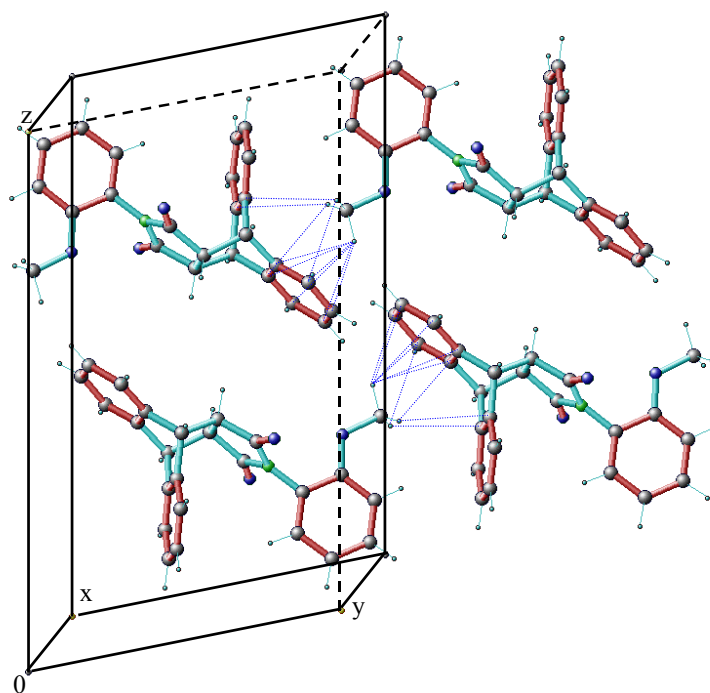

Packing of the independent molecules 2 (the CH/ $\pi$  interactions are marked with blue dotted lines)

Authors:

G. Grossmann, M. J. Potrzebowski, S. Olejniczak, N. E. Ziółkowska, G. D. Bujacz, W. Ciesielski, W. Prezdo, V. Nazarov and V. Golovko
