# Supplementary material for: Solution interaction of O-donor ligand metal complexes with thiocarbonyl compounds—a new general route to metal sulfide materials
Source: Royal Society of Chemistry journal article supplement (doi:10.1039/b300398c), 2003-01-01
Supplement: b300398c-c.pdf [file b300398c-c.pdf]

**Electronic supplementary material** to: Structural studies of N-(2'-substituted phenyl)-9,10-dihydro-9,10-ethanoanthracene-11,12-dicarboximides by X-ray diffraction and NMR spectroscopy – Proofs for CH/ $\pi$  interactions in liquid and solid phases (New J. Chem.)

### Molecular packing and intermolecular CH/ $\pi$ interactions of compound 3

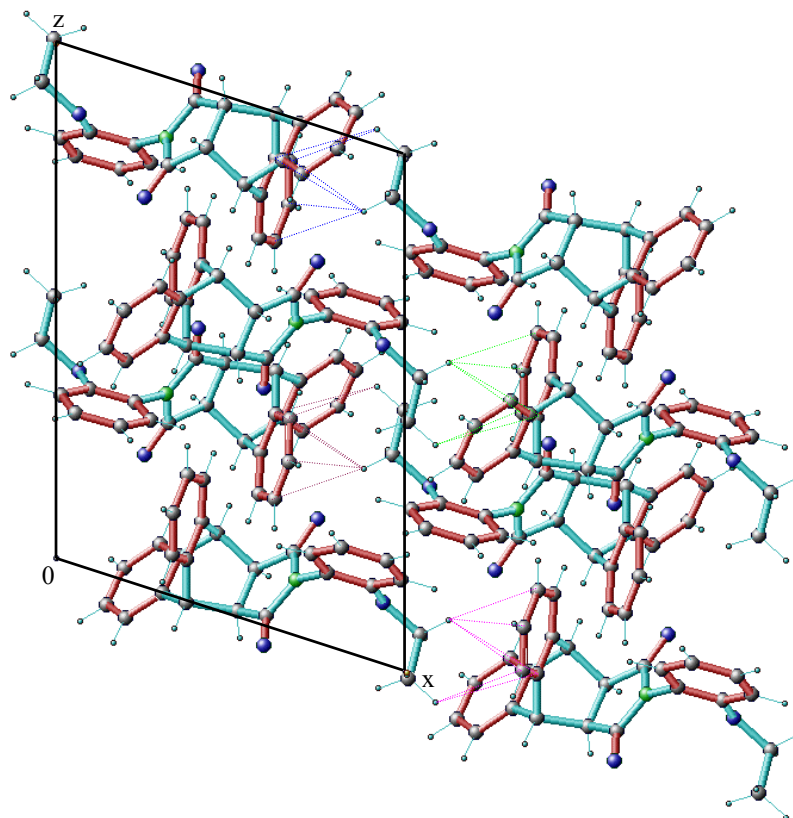

CH/ $\pi$  interactions indicated by dotted lines:

- ..... molecules (x,y,z)
- ..... molecules (-x,-y,-z)
- ..... molecules (-x, $\frac{1}{2}$ +y,-z)
- ..... molecules (x, $\frac{1}{2}$ -y,z)

Authors:

G. Grossmann, M. J. Potrzebowski, S. Olejniczak, N. E. Ziłkowska, G. D. Bujacz, W. Ciesielski, W. Prezdo, V. Nazarov and V. Golovko
